# Supplementary material for: The Associations between Organophosphate Pesticides (OPs) and Respiratory Disease, Diabetes Mellitus, and Cardiovascular Disease: A Review and Meta-Analysis of Observational Studies
Source: MDPI journal article supplement (doi:10.3390/toxics11090741), 2023-08-30
Supplement: s1 [file s1]

## Supplementary material—Search strategy

### Search strategy: date-2<sup>nd</sup> September 2022

**Pubmed:** ((diabetes mellitus) OR (DM) OR (T2DM) OR (diabetes) OR (respiratory disease) OR (pulmonary disease) OR (lung disease) OR (cardiovascular disease) OR (heart disease) OR (kidney disease) OR (kidney failure) OR (renal disease) OR (renal failure) OR (renal insufficiency) OR (liver disease) OR (liver function) OR (liver fibrosis)) AND ((organophosphorus pesticide) OR (OPs) OR (organophosphorus insecticide))

1410

**Web of science:** (TS=(diabetes mellitus) OR TS=(DM) OR TS=(T2DM) OR TS=(diabetes) OR TS=(respiratory disease) OR TS=(pulmonary disease) OR TS=(lung disease) OR TS=(cardiovascular disease) OR TS=(heart disease) OR TS=(kidney disease) OR TS=(kidney failure) OR TS=(renal disease) OR TS=(renal failure) OR TS=(renal insufficiency) OR TS=(liver disease) OR TS=(liver function) OR TS=(liver fibrosis)) AND (TS=(organophosphorus pesticide) OR TS=(OPs) OR TS=(organophosphorus insecticide))

1939

### Ovid:

1 organophosphorus pesticide.mp. [mp=tx, bt, ti, ab, ct, sh, ot, nm, hw, fx, kf, ox, px, rx, an, ui ds, on, sy]

2 organophosphorus insecticide.mp. [mp=tx, bt, ti, ab, ct, sh, ot, nm, hw, fx, kf, ox, px, rx, an, ui ds, on, sy]

3 OPs.mp. [mp=tx, bt, ti, ab, ct, sh, ot, nm, hw, fx, kf, ox, px, rx, an, ui ds, on, sy]

4 cardiovascular disease.mp. [mp=tx, bt, ti, ab, ct, sh, ot, nm, hw, fx, kf, ox, px, rx, an, ui ds, on, sy]

5 heart disease.mp. [mp=tx, bt, ti, ab, ct, sh, ot, nm, hw, fx, kf, ox, px, rx, an, ui ds, on, sy]

6 diabetes mellitus.mp. [mp=tx, bt, ti, ab, ct, sh, ot, nm, hw, fx, kf, ox, px, rx, an, ui ds, on, sy]

7 T2DM.mp. [mp=tx, bt, ti, ab, ct, sh, ot, nm, hw, fx, kf, ox, px, rx, an, ui ds, on, sy]

8 diabetes.mp. [mp=tx, bt, ti, ab, ct, sh, ot, nm, hw, fx, kf, ox, px, rx, an, ui ds, on, sy]

9 respiratory disease.mp. [mp=tx, bt, ti, ab, ct, sh, ot, nm, hw, fx, kf, ox, px, rx, an, ui ds, on, sy]

10 pulmonary disease.mp. [mp=tx, bt, ti, ab, ct, sh, ot, nm, hw, fx, kf, ox, px, rx, an, ui ds, on, sy]

11 lung disease.mp. [mp=tx, bt, ti, ab, ct, sh, ot, nm, hw, fx, kf, ox, px, rx, an, ui ds, on, sy]

12 kidney disease.mp. [mp=tx, bt, ti, ab, ct, sh, ot, nm, hw, fx, kf, ox, px, rx, an, ui ds, on, sy]

13 kidney failure.mp. [mp=tx, bt, ti, ab, ct, sh, ot, nm, hw, fx, kf, ox, px, rx, an, ui ds, on, sy]

14 renal disease.mp. [mp=tx, bt, ti, ab, ct, sh, ot, nm, hw, fx, kf, ox, px, rx, an, ui ds, on, sy]

15 renal failure.mp. [mp=tx, bt, ti, ab, ct, sh, ot, nm, hw, fx, kf, ox, px, rx, an, ui ds, on, sy]

16 renal insufficiency.mp. [mp=tx, bt, ti, ab, ct, sh, ot, nm, hw, fx, kf, ox, px, rx, an, ui ds, on, sy]

17 liver disease.mp. [mp=tx, bt, ti, ab, ct, sh, ot, nm, hw, fx, kf, ox, px, rx, an, ui ds, on, sy]

18 liver function.mp. [mp=tx, bt, ti, ab, ct, sh, ot, nm, hw, fx, kf, ox, px, rx, an, ui ds, on, sy]

19 liver fibrosis.mp. [mp=tx, bt, ti, ab, ct, sh, ot, nm, hw, fx, kf, ox, px, rx, an, ui ds, on, sy]

12 4 or 5 or 6 or 7 or 8 or 9 or 10 or 11 or 12 or 13 or 14 or 15 or 16 or 17 or 18 or 19

13 1 or 2 or 3

14 12 and 13

1277

**Embase:** ('organophosphorus pesticide':ti,ab,kw OR 'organophosphorus insecticide':ti,ab,kw OR 'ops':ti,ab,kw) AND ('cardiovascular disease':ti,ab,kw OR 'heart disease':ti,ab,kw OR 'diabetes mellitus':ti,ab,kw OR 'DM':ti,ab,kw OR 'T2DM':ti,ab,kw OR 'diabetes':ti,ab,kw OR 'respiratory disease':ti,ab,kw OR 'pulmonary disease':ti,ab,kw OR 'lung disease':ti,ab,kw OR 'kidney disease':ti,ab,kw OR 'kidney failure':ti,ab,kw OR 'renal disease':ti,ab,kw OR 'renal failure':ti,ab,kw OR 'renal insufficiency':ti,ab,kw OR 'liver disease':ti,ab,kw OR 'liver function':ti,ab,kw OR 'liver fibrosis':ti,ab,kw)

225

### **Cochrane Library**

ID Search Hits

#1 organophosphorus pesticide

#2 organophosphorus insecticide

#3 OPs

#4 diabetes mellitus

#5 DM

#6 T2DM

#7 diabetes

#8 respiratory disease

#9 pulmonary disease

#10 lung disease

#11 cardiocascular disease

#12 heart disease

#13 kidney disease

#14 kidney failure

#15 renal disease

#16 renal failure

#17 renal insufficiency

#18 liver disease

#19 liver function

#20 liver fibrosis

#21 (#1 or #2 or #3) AND (#4 or #5 or #6 or #7 or #8 or #9 or #10 or #11 or #12 or #13 or #14 or #15 or #16 or #17 or #18 or #19 or #20)

65
