# Supplementary material for: The Associations between Organophosphate Pesticides (OPs) and Respiratory Disease, Diabetes Mellitus, and Cardiovascular Disease: A Review and Meta-Analysis of Observational Studies
Source: MDPI journal article supplement (doi:10.3390/toxics11090741), 2023-08-30
Supplement: s1 [file s1]

## Additional file 2

| <b>Figure of contents:</b>                                                                                                                                   | pages |
|--------------------------------------------------------------------------------------------------------------------------------------------------------------|-------|
| <b>Figure S1.</b> Funnel plot for the association between organophosphate pesticides and respiratory diseases.                                               | 2     |
| <b>Figure S2.</b> The significant association between individual organophosphate pesticides exposure and respiratory diseases.                               | 3     |
| <b>Figure S3.</b> The association between organophosphate pesticides exposure and participant's ethnicity (America and Asian) in respiratory diseases group. | 4     |
| <b>Figure S4.</b> The association between organophosphate pesticides exposure and participant's gender in respiratory diseases group.                        | 5     |
| <b>Figure S5.</b> The association between organophosphate pesticides exposure and study design in respiratory diseases group.                                | 6     |
| <b>Figure S6.</b> Funnel plot for the association between organophosphate pesticides and diabetes mellitus.                                                  | 7     |
| <b>Figure S7.</b> The association between organophosphate pesticides exposure and study design in diabetes mellitus group.                                   | 8     |
| <b>Figure S8.</b> Funnel plot for the association between organophosphate pesticides and cardiovascular disease.                                             | 9     |

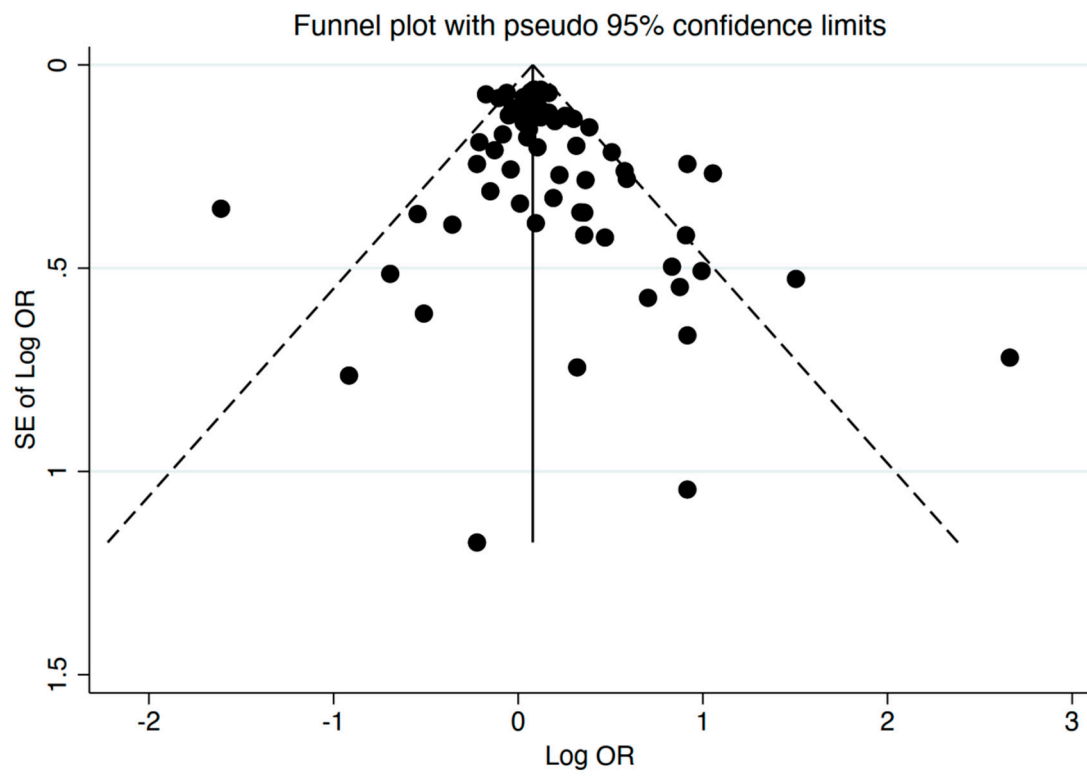

**Figure S1.** Funnel plot for the association between organophosphate pesticides and respiratory diseases.

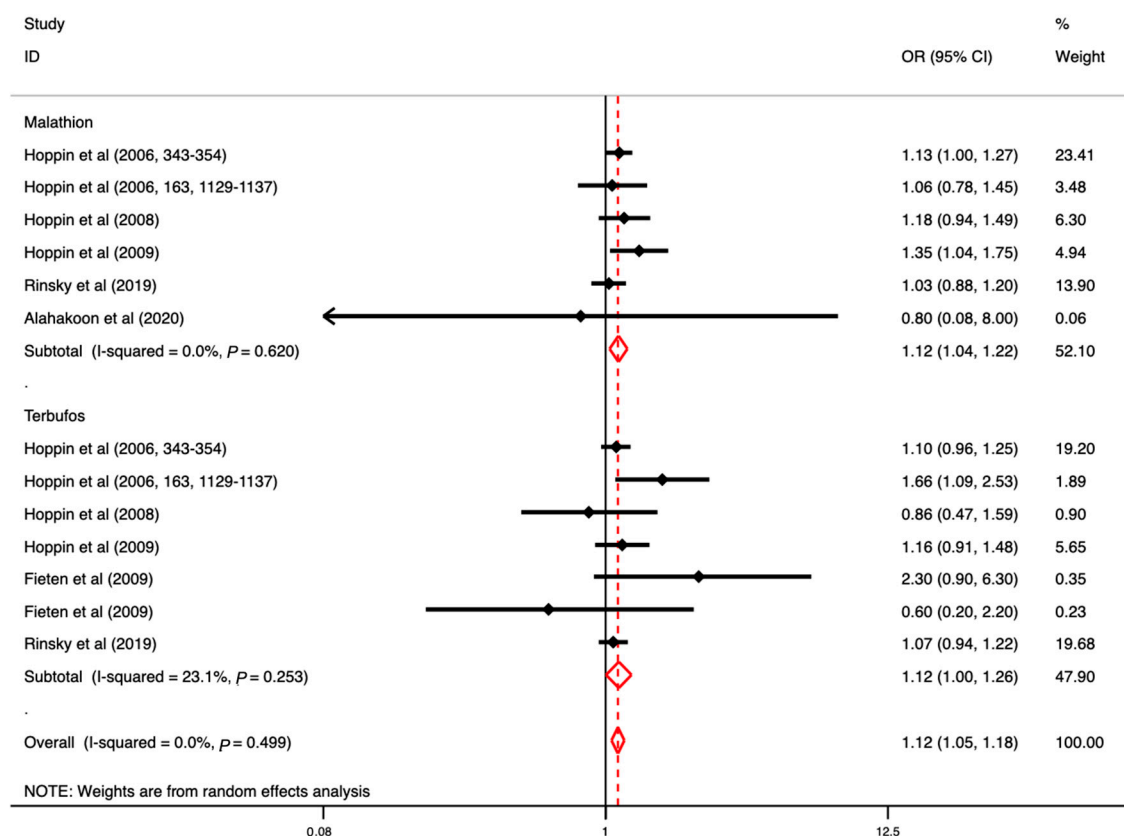

**Figure S2.** The significant association between individual organophosphate pesticides exposure and respiratory diseases.

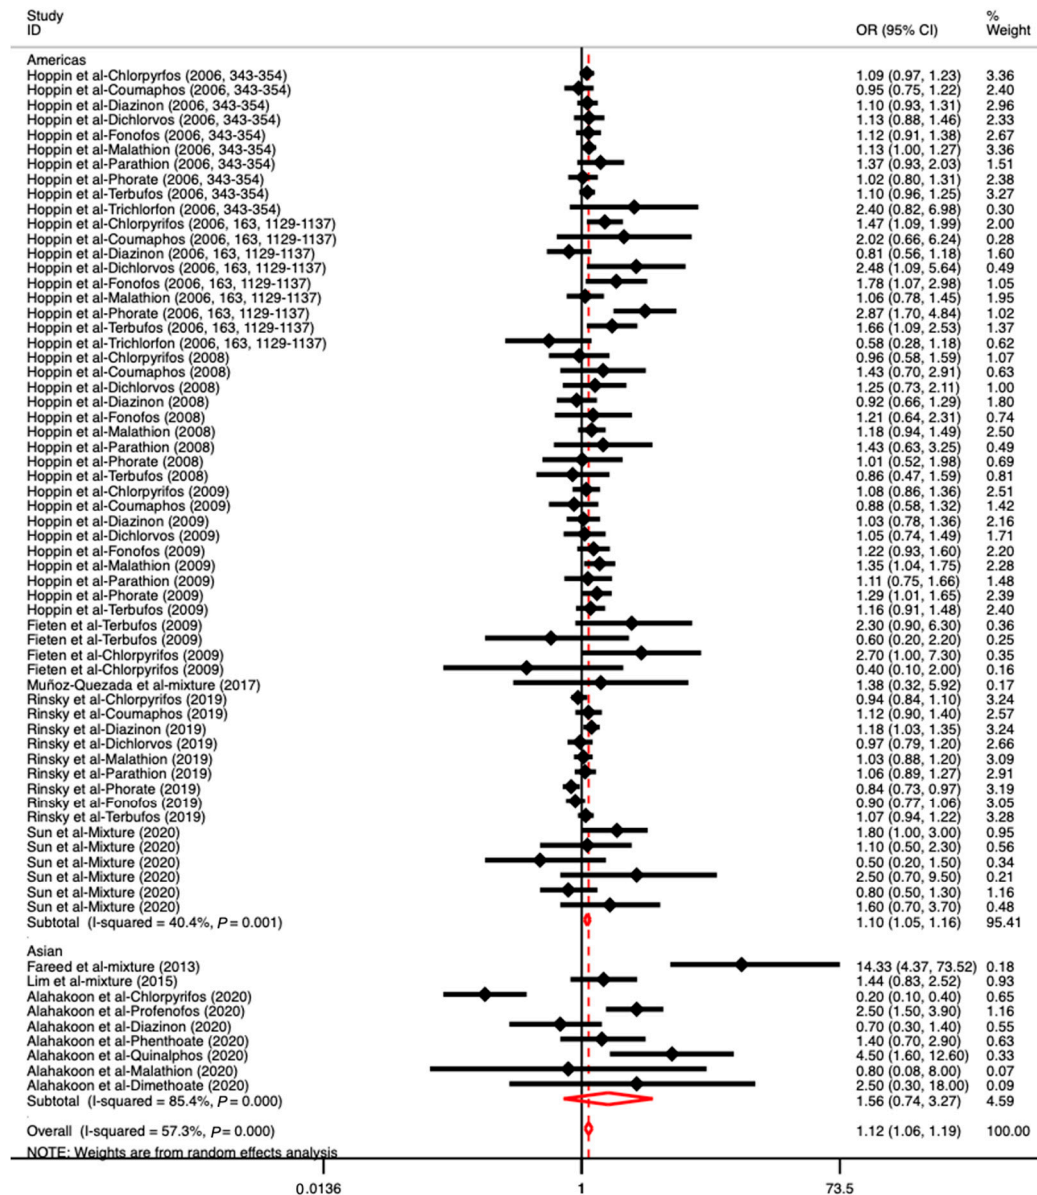

**Figure S3.** The association between organophosphate pesticides exposure and participant's ethnicity (America and Asian) in respiratory diseases group.

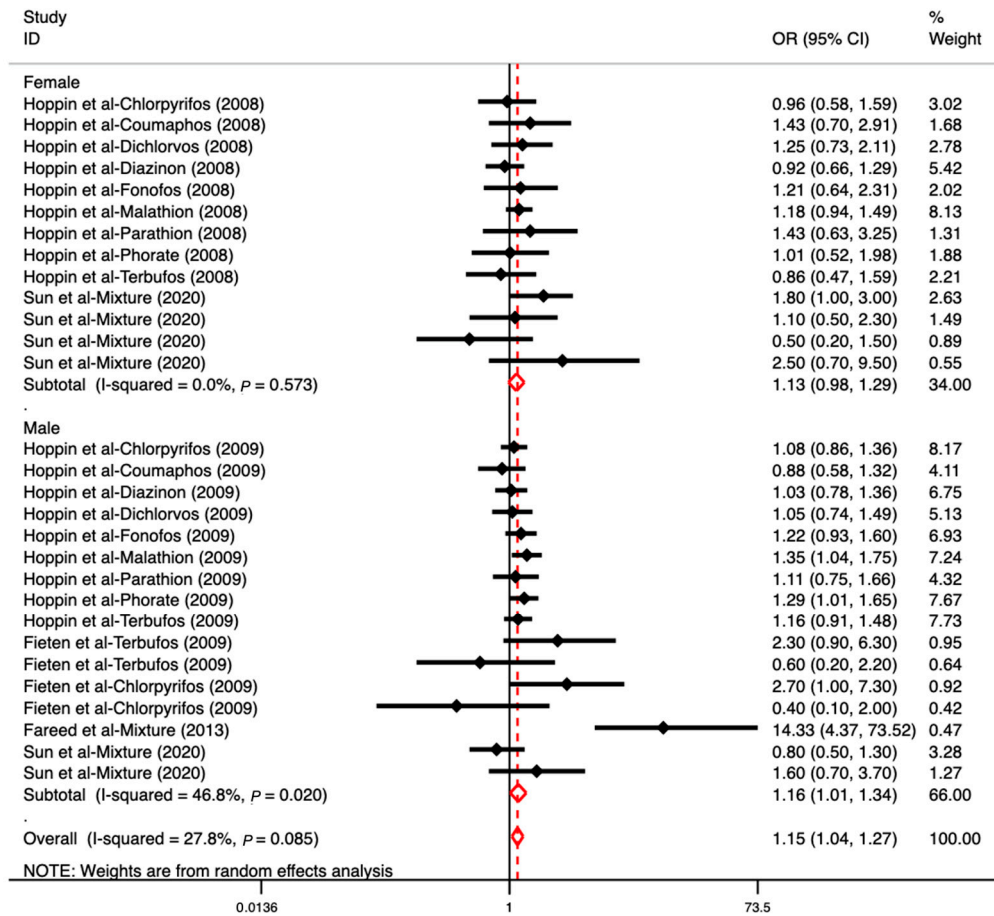

**Figure S4.** The association between organophosphate pesticides exposure and participant's gender in respiratory diseases group.

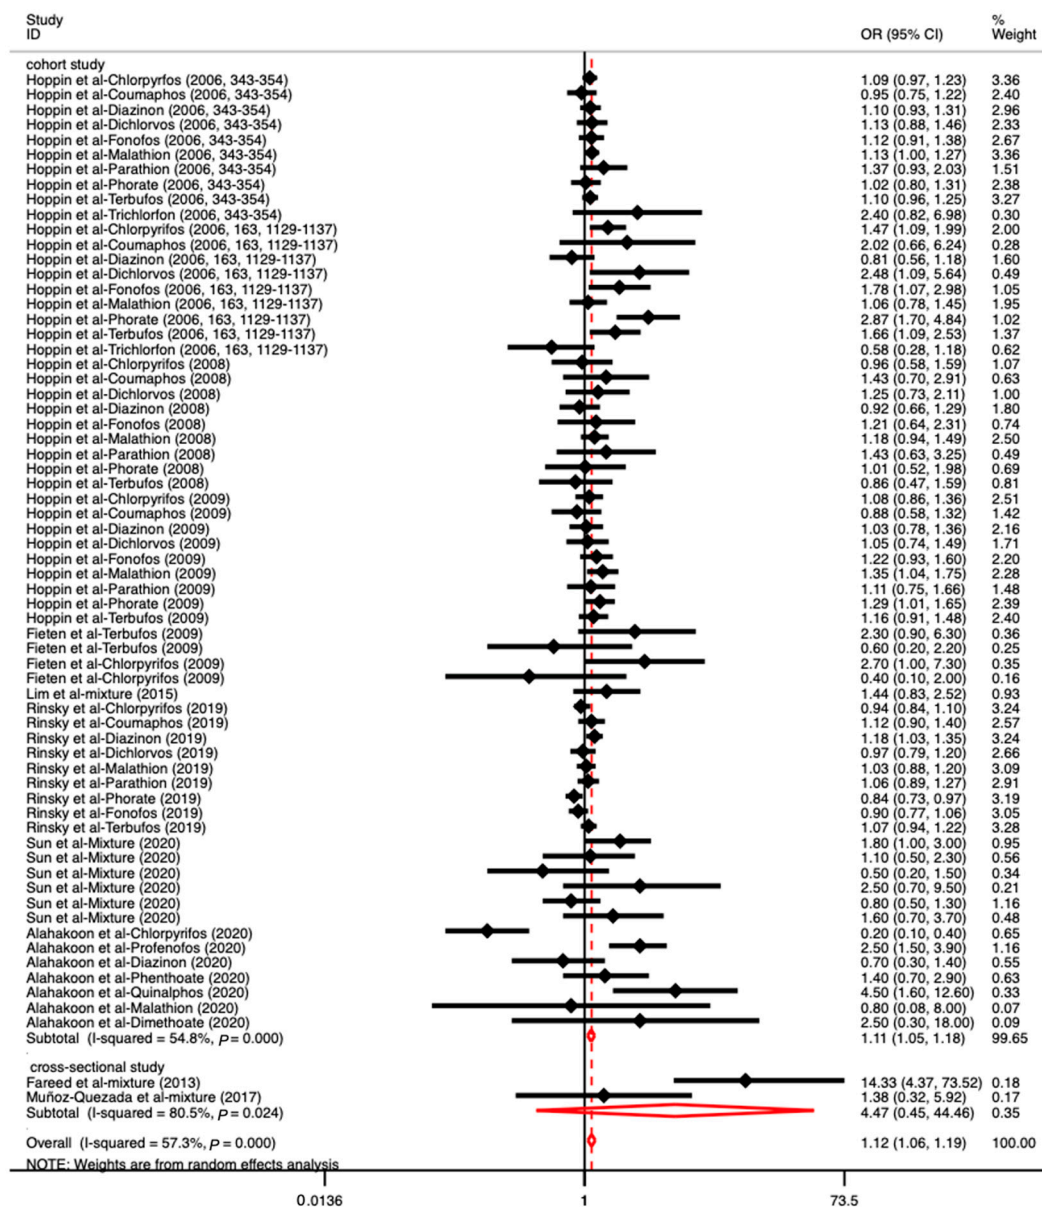

**Figure S5.** The association between organophosphate pesticides exposure and study design in respiratory diseases group.

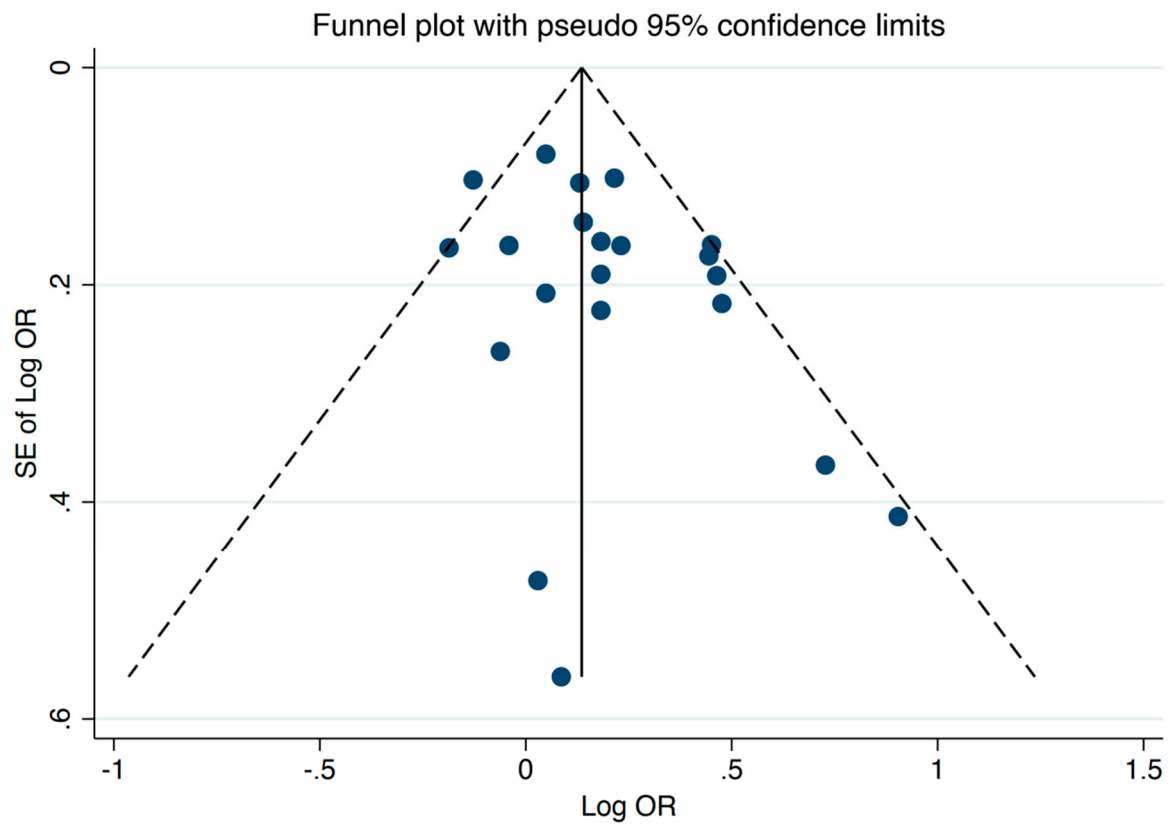

**Figure S6.** Funnel plot for the association between organophosphate pesticides and diabetes mellitus.

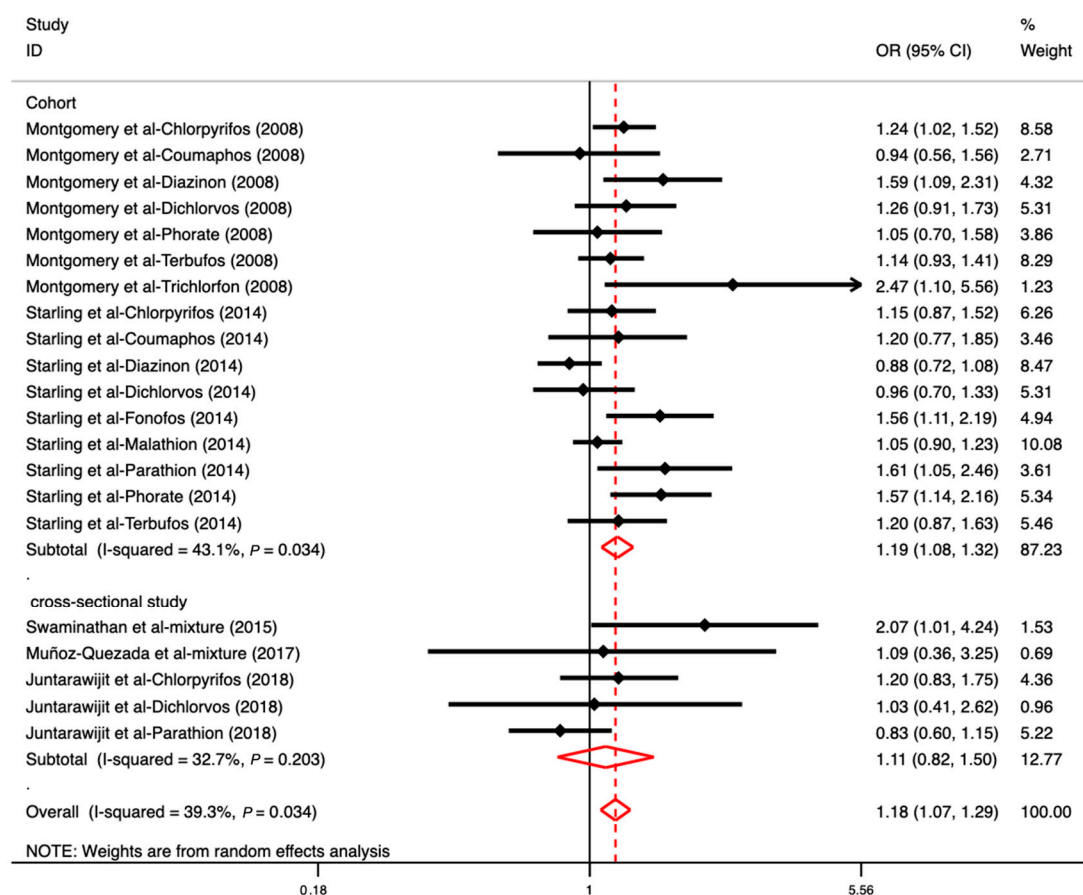

**Figure S7.** The association between organophosphate pesticides exposure and study design in diabetes mellitus group.



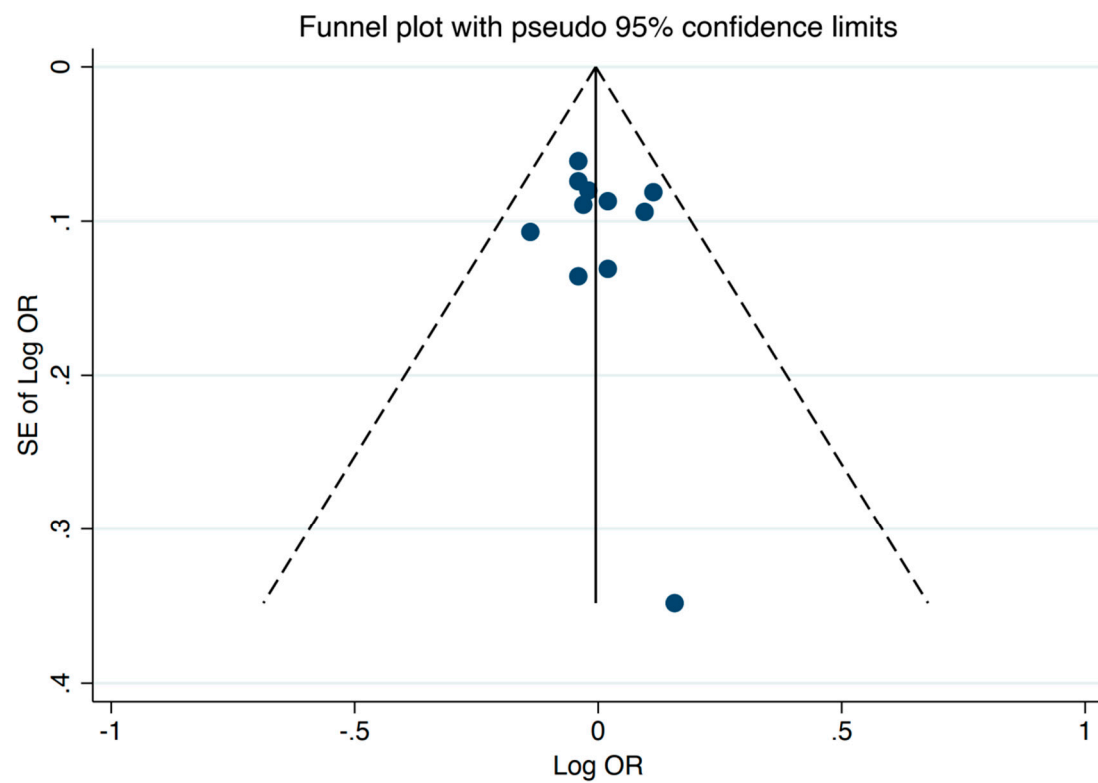

**Figure S8.** Funnel plot for the association between organophosphate pesticides and cardiovascular disease.
